# Supplementary material
Source: publisher site journal article supplement (https://www.dovepress.com/get_supplementary_file.php?f=230367.docx)
Supplement: Supplementary file 1 [file get_supplementary_file.php]

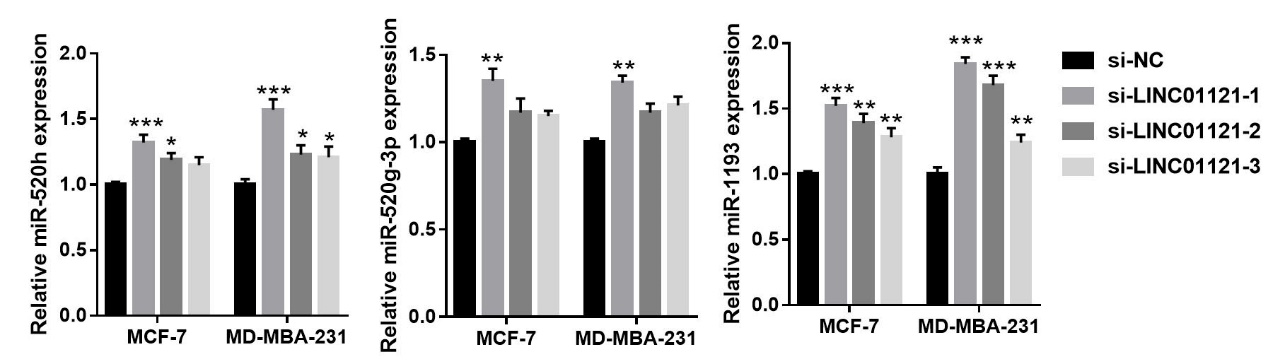


Supplement figure 1: The effect of *LINC01121* knockdown on miR-520h, miR-520g-3p, and miR-1193 expression. The expression of miR-1193, miR-520h, and miR-520g-3p in MCF-7 and MDA-MB-231 cells was measured by qRT-PCR after transfected si-*LINC01121-*1/2/3 at 48 h. (**p* < 0.05, ***p* < 0.01, ****p* < 0.001 *vs* si-NC)
